# Supplementary material
Source: PubMed Central journal article supplement (PMC3632650)

**A**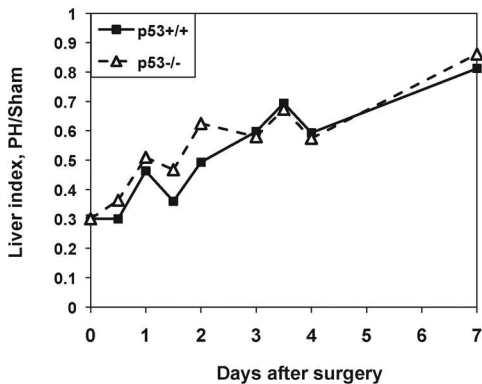**B**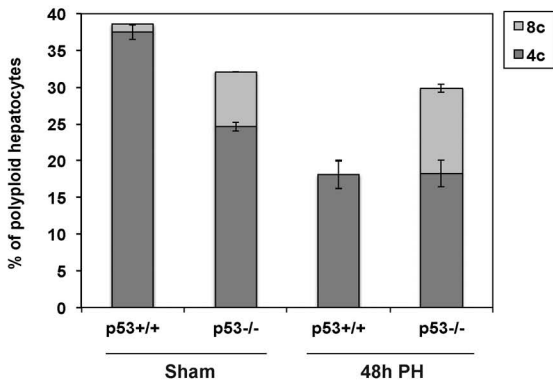

A.

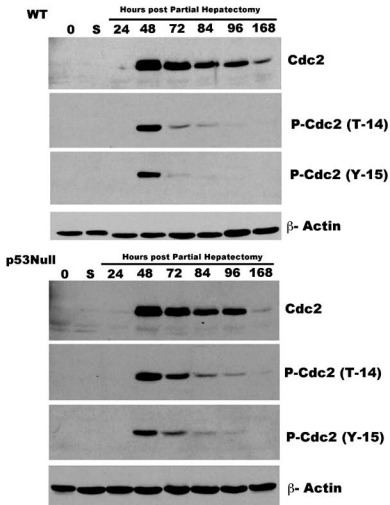

B.

48h

72h

96h

p53<sup>+/+</sup>

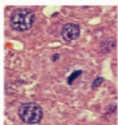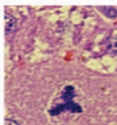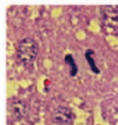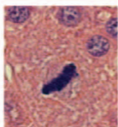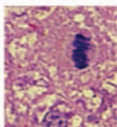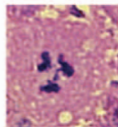

48h

72h

96h

p53<sup>-/-</sup>

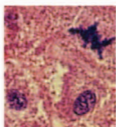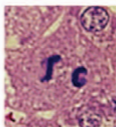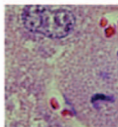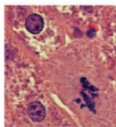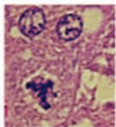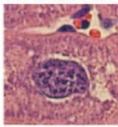

A

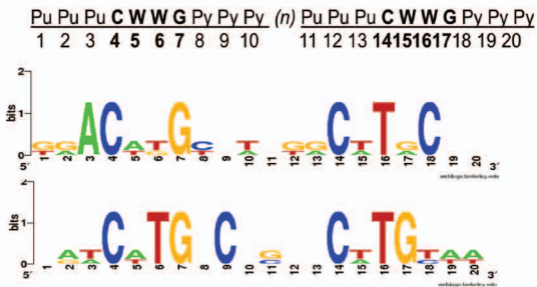

B

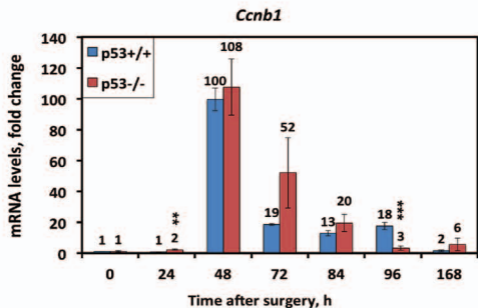

C

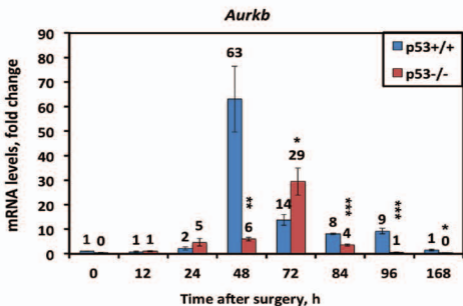

Supplement: NIHMS433112-supplement-Supp_Figure_01-03.pdf [file NIHMS433112-supplement-Supp_Figure_01-03.pdf]
